# Supplementary material for: Antidepressant use and risk of epilepsy and seizures in people aged 20 to 64 years: cohort study using a primary care database
Source: Springer Nature journal article supplement (doi:10.1186/s12888-015-0701-9), 2015-12-01
Supplement: MOESM1 [file 9748338]

## **Antidepressant use and risk of epilepsy and seizures in people aged 20 to 64 years: cohort study using a primary care database**

Hill T, Coupland C, Morriss R, Arthur A, Moore M, Hippisley-Cox J.

### **Additional file 1.pdf**

#### **Contents:**

Table S1: List of Read codes included in the definition of the epilepsy/seizures outcome.

Table S2: Read codes used for identification of patients with depression and their assigned severity.

Table S3: Baseline characteristics of patients according to the class of antidepressant first prescribed.

Table S4: 5-year hazard ratios for epilepsy/seizures by antidepressant class, dose and individual drug, with SSRIs, mid-dose SSRI and citalopram as the reference categories respectively.

Table S5: 5-year hazard ratios for epilepsy/seizures by antidepressant class, dose and individual drug, with untreated patients excluded from the cohort.

Table S6: 5-year hazard ratios for epilepsy/seizures by antidepressant class, dose and individual drug, with patients on anticonvulsants at baseline excluded from the cohort.

Table S7: 1-year hazard ratios for epilepsy/seizures by antidepressant class, dose and individual drug.

Table S8: 1-year hazard ratios for epilepsy/seizures by antidepressant class, dose and individual drug, with SSRIs, mid-dose SSRI and citalopram as the reference categories respectively.

**Table S1: List of Read codes included in the definition of the epilepsy/seizures outcome**

| Read term | Description                                         |  | Read term | Description                                                   |
|-----------|-----------------------------------------------------|--|-----------|---------------------------------------------------------------|
| F1321     | Progressive myoclonic epilepsy                      |  | F2553-1   | Partial epilepsy with autonomic symptoms                      |
| F25       | Epilepsy                                            |  | F2554     | Visual reflex epilepsy                                        |
| F250      | Generalised non-convulsive epilepsy                 |  | F2555     | Unilateral epilepsy                                           |
| F2500     | Petit mal (minor) epilepsy                          |  | F2556     | Simple partial epileptic seizure                              |
| F2500-1   | Epileptic absences                                  |  | F255y     | Partial epilepsy without impairment of consciousness OS       |
| F2500-99  | Petit mal epilepsy                                  |  | F255z     | Partial epilepsy without impairment of consciousness NOS      |
| F2501     | Pykno-epilepsy                                      |  | F256      | Infantile spasms                                              |
| F2502     | Epileptic seizures - atonic                         |  | F256-1    | Lightning spasms                                              |
| F2503     | Epileptic seizures - akinetic                       |  | F256-2    | West syndrome                                                 |
| F2504     | Juvenile absence epilepsy                           |  | F256-99   | Infantile spasms -hypsarhythmia                               |
| F2505     | Lennox-Gastaut syndrome                             |  | F2560     | Hypsarrhythmia                                                |
| F250y     | Other specified generalised non-convulsive epilepsy |  | F2561     | Salaam attacks                                                |
| F250z     | Generalised non-convulsive epilepsy NOS             |  | F256z     | Infantile spasms NOS                                          |
| F251      | Generalised convulsive epilepsy                     |  | F257      | Kojevnikov's epilepsy                                         |
| F2510     | Grand mal (major) epilepsy                          |  | F258      | Post-ictal state                                              |
| F2510-1   | Tonic-clonic epilepsy                               |  | F259      | Early infant epileptic encephalopathy with suppression bursts |
| F2510-99  | Grand mal epilepsy                                  |  | F259-1    | Ohtahara syndrome                                             |
| F2511     | Neonatal myoclonic epilepsy                         |  | F25A      | Juvenile myoclonic epilepsy                                   |
| F2511-1   | Otohara syndrome                                    |  | F25B      | Alcohol-induced epilepsy                                      |
| F2512     | Epileptic seizures - clonic                         |  | F25C      | Drug-induced epilepsy                                         |
| F2513     | Epileptic seizures - myoclonic                      |  | F25D      | Menstrual epilepsy                                            |
| F2514     | Epileptic seizures - tonic                          |  | F25E      | Stress-induced epilepsy                                       |
| F2515     | Tonic-clonic epilepsy                               |  | F25F      | Photosensitive epilepsy                                       |
| F251y     | Other specified generalised convulsive epilepsy     |  | F25X      | Status epilepticus, unspecified                               |
| F251z     | Generalised convulsive epilepsy NOS                 |  | F25y      | Other forms of epilepsy                                       |
| F252      | Petit mal status                                    |  | F25y0     | Cursive (running) epilepsy                                    |

|          |                                                       |  |          |                                                              |
|----------|-------------------------------------------------------|--|----------|--------------------------------------------------------------|
| F253     | Grand mal status                                      |  | F25y1    | Gelastic epilepsy                                            |
| F253-1   | Status epilepticus                                    |  | F25y2*   | Locl-rlt(foc)(part)idiop epilep&epilptic syn seiz locl onset |
| F254     | Partial epilepsy with impairment of consciousness     |  | F25y3    | Complex partial status epilepticus                           |
| F2540    | Temporal lobe epilepsy                                |  | F25y4    | Benign Rolandic epilepsy                                     |
| F2541    | Psychomotor epilepsy                                  |  | F25yz    | Other forms of epilepsy NOS                                  |
| F2542    | Psychosensory epilepsy                                |  | F25z     | Epilepsy NOS                                                 |
| F2543    | Limbic system epilepsy                                |  | SC200    | Traumatic epilepsy                                           |
| F2544    | Epileptic automatism                                  |  | 1B27     | Seizures in response to acute event                          |
| F2545    | Complex partial epileptic seizure                     |  | 282-3    | O/E - a seizure                                              |
| F2545-99 | Partial complex seizure                               |  | 2824-1   | O/E - Jacksonian fit                                         |
| F254z    | Partial epilepsy with impairment of consciousness NOS |  | 2824-2   | O/E - focal fit                                              |
| F255     | Partial epilepsy without impairment of consciousness  |  | 282Z     | O/E - fit/convulsion NOS                                     |
| F2550    | Jacksonian, focal or motor epilepsy                   |  | 667T     | Daily seizures                                               |
| F2550-1  | Focal epilepsy                                        |  | 667V     | Many seizures a day                                          |
| F2550-2  | Motor epilepsy                                        |  | EMISCTR3 | Tremors/seizures                                             |
| F2551    | Sensory induced epilepsy                              |  | F2516    | Grand mal seizure                                            |
| F2552    | Somatosensory epilepsy                                |  | R003z-1  | [D]Seizure NOS                                               |
| F2553    | Visceral reflex epilepsy                              |  | F2553-1  | Partial epilepsy with autonomic symptoms                     |

\* Localization-related (focal) (partial) idiopathic epilepsy and epileptic syndromes with seizures of localized onset. (ICD10 code G40.0)

**Table S2: Read codes used for identification of patients with depression and their assigned severity**

| <b>Read code</b> | <b>Read code description</b>                           | <b>Depression severity<sup>1</sup></b> |
|------------------|--------------------------------------------------------|----------------------------------------|
| 1465             | H/O: depression                                        | mild                                   |
| 1B17             | Depressed                                              | mild                                   |
| 1B17-1           | C/O - feeling depressed                                | mild                                   |
| 1B1U             | Symptoms of depression                                 | mild (*)                               |
| 1B1U-1           | Depressive symptoms                                    | mild (*)                               |
| 1JJ              | Suspected depression                                   | mild (*)                               |
| 8CAa             | Patient given advice about management of depression    | mild (*)                               |
| E1121            | Single major depressive episode, mild                  | mild                                   |
| E1126            | Single major depressive episode, in full remission     | mild                                   |
| E1131            | Recurrent major depressive episodes, mild              | mild                                   |
| E1136            | Recurrent major depressive episodes, in full remission | mild                                   |
| E118             | Seasonal affective disorder                            | mild                                   |
| E2003            | Anxiety with depression                                | mild                                   |
| E204             | Neurotic depression reactive type                      | mild                                   |
| E204-99          | Reactive (neurotic) depression                         | mild (*)                               |
| E2112            | Depressive personality disorder                        | mild                                   |
| E290             | Brief depressive reaction                              | mild                                   |
| E290z            | Brief depressive reaction NOS                          | mild (*)                               |
| E2B-98           | Depression                                             | mild (*)                               |
| E2B-99           | Depression NOS                                         | mild (*)                               |
| E2B0             | Postviral depression                                   | mild                                   |
| E2B1             | Chronic depression                                     | mild                                   |
| EMISCAB36        | Abnormal depressed feelings                            | mild (*)                               |
| Eu32-1           | [X]Single episode of depressive reaction               | mild                                   |
| Eu32-2           | [X]Single episode of psychogenic depression            | mild (*)                               |

|            |                                                        |              |
|------------|--------------------------------------------------------|--------------|
| Eu32-3     | [X]Single episode of reactive depression               | mild (*)     |
| Eu320      | [X]Mild depressive episode                             | mild         |
| Eu320-99   | Mild depression                                        | mild (*)     |
| Eu324      | [X]Mild depression                                     | mild (*)     |
| Eu32y      | [X]Other depressive episodes                           | mild         |
| Eu32y-2    | [X]Single episode of masked depression NOS             | mild (*)     |
| Eu32z-1    | [X]Depression NOS                                      | mild         |
| Eu32z-2    | [X]Depressive disorder NOS                             | mild (*)     |
| Eu32z-4    | [X] Reactive depression NOS                            | mild (*)     |
| Eu33-1     | [X]Recurrent episodes of depressive reaction           | mild         |
| Eu33-2     | [X]Recurrent episodes of psychogenic depression        | mild         |
| Eu33-3     | [X]Recurrent episodes of reactive depression           | mild (*)     |
| Eu33-4     | [X]Seasonal depressive disorder                        | mild (*)     |
| Eu33-5     | [X]SAD - Seasonal affective disorder                   | mild         |
| Eu330      | [X]Recurrent depressive disorder, current episode mild | mild         |
| Eu341      | [X]Dysthymia                                           | mild         |
| Eu341-1    | [X]Depressive neurosis                                 | mild         |
| Eu341-3    | [X]Neurotic depression                                 | mild (*)     |
| Eu3y1-1    | [X]Recurrent brief depressive episodes                 | mild         |
| Eu412-1    | [X]Mild anxiety depression                             | mild         |
| PCSDT1RE23 | Reactive depression                                    | mild (*)     |
| R007z-3    | [D]Postoperative depression                            | mild         |
|            |                                                        |              |
| 2257       | O/E - depressed                                        | moderate     |
| 62T1       | Puerperal depression                                   | moderate (*) |
| 9kQ-1      | On full dose long term treatment for depression        | moderate (*) |
| E002       | Senile dementia with depressive or paranoid features   | moderate     |
| E0021      | Senile dementia with depression                        | moderate     |

|            |                                                              |              |
|------------|--------------------------------------------------------------|--------------|
| E002z      | Senile dementia with depressive or paranoid features NOS     | moderate     |
| E112       | Single major depressive episode                              | moderate     |
| E112-2     | Endogenous depression first episode                          | moderate     |
| E112-3     | Endogenous depression first episode                          | moderate     |
| E1122      | Single major depressive episode, moderate                    | moderate     |
| E1123      | Single major depressive episode, severe, without psychosis   | moderate     |
| E1125      | Single major depressive episode, partial or unspec remission | moderate     |
| E112z      | Single major depressive episode NOS                          | moderate     |
| E1132      | Recurrent major depressive episodes, moderate                | moderate     |
| E1135      | Recurrent major depressive episodes,partial/unspec remission | moderate     |
| E1137      | Recurrent depression                                         | moderate (*) |
| E11y       | Other and unspecified manic-depressive psychoses             | moderate     |
| E11y2      | Atypical depressive disorder                                 | moderate     |
| E11z2      | Masked depression                                            | moderate     |
| E204-1     | Postnatal depression                                         | moderate     |
| E291       | Prolonged depressive reaction                                | moderate     |
| E2B        | Depressive disorder NEC                                      | moderate     |
| EGTON306   | Post natal depression                                        | moderate (*) |
| EMISNQAN25 | Antenatal depression                                         | moderate (*) |
| Eu32       | [X]Depressive episode                                        | moderate (*) |
| Eu321      | [X]Moderate depressive episode                               | moderate     |
| Eu321-99   | Moderate depression                                          | moderate (*) |
| Eu322-3    | [X]Single episode vital depression w/out psychotic symptoms  | moderate (*) |
| Eu32B      | [X]Antenatal depression                                      | moderate (*) |
| Eu32y-1    | [X]Atypical depression                                       | moderate     |
| Eu32z      | [X]Depressive episode, unspecified                           | moderate (*) |
| Eu32z-3    | [X]Prolonged single episode of reactive depression           | moderate (*) |
| Eu33       | [X]Recurrent depressive disorder                             | moderate (*) |

|          |                                                              |              |
|----------|--------------------------------------------------------------|--------------|
| Eu331    | [X]Recurrent depressive disorder, current episode moderate   | moderate (*) |
| Eu332-1  | [X]Endogenous depression without psychotic symptoms          | moderate     |
| Eu332-2  | [X]Major depression, recurrent without psychotic symptoms    | moderate     |
| Eu332-4  | [X]Vital depression, recurrent without psychotic symptoms    | moderate (*) |
| Eu334    | [X]Recurrent depressive disorder, currently in remission     | moderate (*) |
| Eu33y    | [X]Other recurrent depressive disorders                      | moderate     |
| Eu33z    | [X]Recurrent depressive disorder, unspecified                | moderate     |
| Eu33z-1  | [X]Monopolar depression NOS                                  | moderate     |
| Eu341-4  | [X]Persistant anxiety depression                             | moderate     |
| Eu3y0-1  | [X]Mixed affective episode                                   | moderate     |
| Eu412    | [X]Mixed anxiety and depressive disorder                     | moderate     |
| Eu530-1  | [X]Postnatal depression NOS                                  | moderate     |
| Eu530-2  | [X]Postpartum depression NOS                                 | moderate     |
| HNG0531  | [RFC] Postnatal depression                                   | moderate (*) |
| HNGNQR13 | [RFC] Depression                                             | moderate (*) |
|          |                                                              |              |
| 9kQ      | On full dose long term treatment depression - enh serv admin | Severe (*)   |
| E0013    | Presenile dementia with depression                           | Severe       |
| E11-2    | Depressive psychoses                                         | Severe       |
| E112-1   | Agitated depression                                          | Severe       |
| E112-4   | Endogenous depression                                        | Severe       |
| E1120    | Single major depressive episode, unspecified                 | Severe       |
| E1124    | Single major depressive episode, severe, with psychosis      | Severe       |
| E113     | Recurrent major depressive episode                           | Severe       |
| E113-1   | Endogenous depression - recurrent                            | Severe       |
| E1130    | Recurrent major depressive episodes, unspecified             | Severe       |
| E1133    | Recurrent major depressive episodes, severe, no psychosis    | Severe       |
| E1134    | Recurrent major depressive episodes, severe, with psychosis  | Severe       |

|          |                                                              |            |
|----------|--------------------------------------------------------------|------------|
| E113z    | Recurrent major depressive episode NOS                       | Severe     |
| E11y0    | Unspecified manic-depressive psychoses                       | Severe     |
| E130     | Reactive depressive psychosis                                | Severe     |
| E130-1   | Psychotic reactive depression                                | Severe     |
| E135     | Agitated depression                                          | Severe     |
| Eu322    | [X]Severe depressive episode without psychotic symptoms      | Severe     |
| Eu322-1  | [X]Single episode agitated depressn w/out psychotic symptoms | Severe (*) |
| Eu322-2  | [X]Single episode major depression w/out psychotic symptoms  | Severe     |
| Eu322-99 | Severe depression                                            | Severe (*) |
| Eu323    | [X]Severe depressive episode with psychotic symptoms         | Severe     |
| Eu323-1  | [X]Single episode of major depression and psychotic symptoms | Severe (*) |
| Eu323-2  | [X]Single episode of psychogenic depressive psychosis        | Severe (*) |
| Eu323-3  | [X]Single episode of psychotic depression                    | Severe     |
| Eu323-4  | [X]Single episode of reactive depressive psychosis           | Severe     |
| Eu332    | [X]Recurr depress disorder cur epi severe without psyc sympt | Severe (*) |
| Eu333    | [X]Recurrent depress disorder cur epi severe with psyc symp  | Severe     |
| Eu333-1  | [X]Endogenous depression with psychotic symptoms             | Severe (*) |
| Eu333-3  | [X]Recurr severe episodes/major depression+psychotic symptom | Severe     |
| Eu333-5  | [X]Recurrent severe episodes of psychotic depression         | Severe     |
| Eu333-6  | [X]Recurrent severe episodes/reactive depressive psychosis   | Severe     |

<sup>1</sup> Severity was assigned using codes published by Martinez and colleagues [1] plus some additional codes (\*) by a member of the study team (RM).

1. Martinez C, Rietbrock S, Wise L, Ashby D, Chick J, Moseley J et al. Antidepressant treatment and the risk of fatal and non-fatal self harm in first episode depression: nested case-control study. *BMJ* 2005;330(7488):389.

**Table S3: Baseline characteristics of patients (N=238,963) according to the class of antidepressant first prescribed**

| First antidepressant class prescribed <sup>1</sup> |                        | No antidepressant <sup>2</sup> |                | TCA           |                | SSRI          |                | Other         |                |
|----------------------------------------------------|------------------------|--------------------------------|----------------|---------------|----------------|---------------|----------------|---------------|----------------|
| Characteristic                                     |                        | n                              | % <sup>3</sup> | n             | % <sup>3</sup> | n             | % <sup>3</sup> | n             | % <sup>3</sup> |
| Gender                                             |                        |                                |                |               |                |               |                |               |                |
|                                                    | Male                   | 11,851                         | 40.25          | 12,171        | 38.25          | 64,331        | 38.30          | 4,308         | 47.23          |
|                                                    | Female                 | 17,590                         | 59.75          | 19,645        | 61.75          | 103,625       | 61.70          | 4,813         | 52.77          |
| Age (years)                                        |                        |                                |                |               |                |               |                |               |                |
|                                                    | 20-29                  | 7,303                          | 24.81          | 5,394         | 16.95          | 36,631        | 21.81          | 1,753         | 19.22          |
|                                                    | 30-39                  | 9,818                          | 33.35          | 9,164         | 28.80          | 55,136        | 32.83          | 2,833         | 31.06          |
|                                                    | 40-49                  | 6,328                          | 21.49          | 8,286         | 26.04          | 42,105        | 25.07          | 2,370         | 25.98          |
|                                                    | 50-59                  | 4,501                          | 15.29          | 6,822         | 21.44          | 26,492        | 15.77          | 1,662         | 18.22          |
|                                                    | 60-64                  | 1,491                          | 5.06           | 2,150         | 6.76           | 7,592         | 4.52           | 503           | 5.51           |
| Mean age (SD)                                      |                        |                                |                |               |                |               |                |               |                |
|                                                    | Overall                | 38.62 (11.35)                  |                | 41.65 (11.37) |                | 39.25 (11.00) |                | 40.42 (11.18) |                |
|                                                    | Male                   | 40.18 (11.60)                  |                | 42.34 (11.21) |                | 40.89 (11.01) |                | 40.99 (11.05) |                |
|                                                    | Female                 | 37.57 (11.06)                  |                | 41.21 (11.45) |                | 38.23 (10.87) |                | 39.91 (11.28) |                |
| Ethnicity                                          |                        |                                |                |               |                |               |                |               |                |
|                                                    | White (UK or European) | 27,223                         | 92.47          | 29,903        | 93.99          | 161,022       | 95.87          | 8,728         | 95.69          |
|                                                    | Indian                 | 393                            | 1.33           | 282           | 0.89           | 1,189         | 0.71           | 49            | 0.54           |
|                                                    | Pakistani              | 241                            | 0.82           | 303           | 0.95           | 1,080         | 0.64           | 84            | 0.92           |
|                                                    | Bangladeshi            | 219                            | 0.74           | 230           | 0.72           | 513           | 0.31           | 36            | 0.39           |
|                                                    | Other Asian            | 159                            | 0.54           | 165           | 0.52           | 626           | 0.37           | 32            | 0.35           |
|                                                    | Caribbean              | 330                            | 1.12           | 208           | 0.65           | 927           | 0.55           | 50            | 0.55           |
|                                                    | Black African          | 311                            | 1.06           | 257           | 0.81           | 763           | 0.45           | 44            | 0.48           |
|                                                    | Chinese                | 77                             | 0.26           | 41            | 0.13           | 181           | 0.11           | 8             | 0.09           |
|                                                    | Other                  | 488                            | 1.66           | 427           | 1.34           | 1,655         | 0.99           | 90            | 0.99           |
| Depression severity (index diagnosis)              |                        |                                |                |               |                |               |                |               |                |
|                                                    | Mild                   | 21,870                         | 74.28          | 23,663        | 74.37          | 118,565       | 70.59          | 6,652         | 72.93          |
|                                                    | Moderate               | 6,979                          | 23.71          | 6,991         | 21.97          | 43,010        | 25.61          | 2,038         | 22.34          |
|                                                    | Severe                 | 592                            | 2.01           | 1,162         | 3.65           | 6,39281       | 3.80           | 431           | 4.73           |

|                                            |                                    |              |       |              |       |              |       |              |       |
|--------------------------------------------|------------------------------------|--------------|-------|--------------|-------|--------------|-------|--------------|-------|
|                                            |                                    |              |       |              |       |              |       |              |       |
| Mean BMI in kg/m <sup>2</sup> (SD)         |                                    | 26.09 (5.09) |       | 26.90 (5.32) |       | 26.68 (5.31) |       | 26.52 (5.19) |       |
|                                            |                                    |              |       |              |       |              |       |              |       |
| Smoking <sup>4</sup>                       |                                    |              |       |              |       |              |       |              |       |
|                                            | Recorded                           | 28,333       |       | 31,151       |       | 164,350      |       | 8,848        |       |
|                                            | Non smoker                         | 14,468       | 51.06 | 14,538       | 46.67 | 77,649       | 47.25 | 3,913        | 44.22 |
|                                            | Ex smoker                          | 4,456        | 15.73 | 4,658        | 14.95 | 24,773       | 15.07 | 1,177        | 13.30 |
|                                            | Current smoker                     | 9,409        | 33.21 | 11,955       | 38.38 | 61,928       | 37.68 | 3,758        | 42.47 |
|                                            | Current light smoker               | 3,046        | 10.75 | 3,104        | 9.96  | 16,982       | 10.33 | 902          | 10.19 |
|                                            | Current moderate smoker            | 4,302        | 15.18 | 5,375        | 17.25 | 28,992       | 17.64 | 1,750        | 19.78 |
|                                            | Current heavy smoker               | 2,061        | 7.27  | 3,476        | 11.16 | 15,954       | 9.71  | 1,106        | 12.50 |
|                                            |                                    |              |       |              |       |              |       |              |       |
| Alcohol consumption <sup>4</sup>           |                                    |              |       |              |       |              |       |              |       |
|                                            | Recorded                           | 24,589       |       | 27,711       |       | 142,697      |       | 7,691        |       |
|                                            | Non drinker                        | 6,435        | 26.17 | 8,586        | 30.98 | 37,860       | 26.53 | 2,202        | 28.63 |
|                                            | Trivial (less than 1 unit per day) | 9,340        | 37.98 | 10,301       | 37.17 | 55,146       | 38.65 | 2,645        | 34.39 |
|                                            | Light (1-2 units per day)          | 6,607        | 26.87 | 6,404        | 23.11 | 36,215       | 25.38 | 1,957        | 25.45 |
|                                            | Moderate (3 to 6 units per day)    | 1,721        | 7.00  | 1,822        | 6.58  | 10,256       | 7.19  | 639          | 8.31  |
|                                            | Heavy (7 to 9 units per day)       | 240          | 0.98  | 251          | 0.91  | 1,559        | 1.09  | 116          | 1.51  |
|                                            | Very heavy (over 9 units per day)  | 246          | 1.00  | 347          | 1.25  | 1,661        | 1.16  | 132          | 1.72  |
|                                            |                                    |              |       |              |       |              |       |              |       |
| Townsend deprivation quintile <sup>4</sup> |                                    |              |       |              |       |              |       |              |       |
|                                            | Recorded                           | 28,356       |       | 30,821       |       | 162,235      |       | 8,752        |       |
|                                            | 1 (Least deprived)                 | 5,111        | 18.02 | 5,490        | 17.81 | 32,750       | 20.19 | 1,580        | 18.05 |
|                                            | 2                                  | 5,380        | 18.97 | 5,854        | 18.99 | 33,303       | 20.53 | 1,582        | 18.08 |
|                                            | 3                                  | 5,589        | 19.71 | 6,170        | 20.02 | 34,703       | 21.39 | 1,725        | 19.71 |
|                                            | 4                                  | 5,810        | 20.49 | 6,512        | 21.13 | 32,719       | 20.17 | 1,882        | 21.50 |
|                                            | 5 (Most deprived)                  | 6,466        | 22.80 | 6,795        | 22.05 | 28,760       | 17.73 | 1,983        | 22.66 |
|                                            |                                    |              |       |              |       |              |       |              |       |
| <b>Comorbidities</b>                       |                                    |              |       |              |       |              |       |              |       |
|                                            | CHD                                | 632          | 2.15  | 580          | 1.82  | 2,691        | 1.60  | 200          | 2.19  |
|                                            | Diabetes                           | 1,195        | 4.06  | 1,145        | 3.60  | 4,761        | 2.83  | 260          | 2.85  |
|                                            | Hypertension                       | 2,238        | 7.60  | 2,651        | 8.33  | 11,633       | 6.93  | 656          | 7.19  |
|                                            | Stroke/TIA                         | 209          | 0.71  | 273          | 0.86  | 1,152        | 0.69  | 102          | 1.12  |

|  |                                            |       |       |       |       |        |       |       |       |
|--|--------------------------------------------|-------|-------|-------|-------|--------|-------|-------|-------|
|  | Any cancer                                 | 403   | 1.37  | 629   | 1.98  | 2,595  | 1.55  | 167   | 1.83  |
|  | Epilepsy/seizures                          | 533   | 1.81  | 394   | 1.24  | 2,125  | 1.27  | 263   | 2.88  |
|  | Hypothyroidism                             | 547   | 1.86  | 786   | 2.47  | 3,728  | 2.22  | 196   | 2.15  |
|  | Obsessive-compulsive disorder              | 55    | 0.19  | 53    | 0.17  | 362    | 0.22  | 22    | 0.24  |
|  | Rheumatoid arthritis                       | 118   | 0.40  | 272   | 0.85  | 846    | 0.50  | 63    | 0.69  |
|  | Osteoarthritis                             | 761   | 2.58  | 1,516 | 4.76  | 4,646  | 2.77  | 284   | 3.11  |
|  | Osteoporosis                               | 96    | 0.33  | 147   | 0.46  | 583    | 0.35  | 40    | 0.44  |
|  | Liver disease                              | 101   | 0.34  | 119   | 0.37  | 435    | 0.26  | 40    | 0.44  |
|  | Renal disease                              | 77    | 0.26  | 79    | 0.25  | 380    | 0.23  | 11    | 0.12  |
|  | Asthma/chronic obstructive airways disease | 3,768 | 12.80 | 4,462 | 14.02 | 22,326 | 13.29 | 1,180 | 12.94 |
|  |                                            |       |       |       |       |        |       |       |       |
|  | <b>Medications at baseline</b>             |       |       |       |       |        |       |       |       |
|  | Anticonvulsants                            | 405   | 1.38  | 453   | 1.42  | 1,524  | 0.91  | 276   | 3.03  |
|  | Antihypertensives                          | 2,858 | 9.71  | 4,104 | 12.90 | 17,235 | 10.26 | 1,092 | 11.97 |
|  | Anti-psychotics                            | 67    | 0.23  | 122   | 0.38  | 471    | 0.28  | 167   | 1.83  |
|  | Aspirin                                    | 1,005 | 3.41  | 1,147 | 3.61  | 4,664  | 2.78  | 329   | 3.61  |
|  | Anticoagulants                             | 152   | 0.52  | 178   | 0.56  | 686    | 0.41  | 55    | 0.60  |
|  | Bisphosphonates                            | 86    | 0.29  | 156   | 0.49  | 569    | 0.34  | 43    | 0.47  |
|  | Hypnotics/anxiolytics                      | 506   | 1.72  | 1,856 | 5.83  | 8,209  | 4.89  | 735   | 8.06  |
|  | NSAIDs                                     | 764   | 2.60  | 3,394 | 10.67 | 7,988  | 4.76  | 542   | 5.94  |
|  | Statins                                    | 1,542 | 5.24  | 1,588 | 4.99  | 7,231  | 4.31  | 450   | 4.93  |
|  | Oral contraceptives <sup>5</sup>           | 2,975 | 10.10 | 3,043 | 9.56  | 20,577 | 12.25 | 763   | 8.37  |
|  | HRT <sup>5</sup>                           | 590   | 2.00  | 1,450 | 4.56  | 4,886  | 2.91  | 266   | 2.92  |

<sup>1</sup> MAOI (n=22) and Combined group (n=607) not shown

<sup>2</sup> The no antidepressant column includes only patients who were never treated. For the purposes of the time-varying analyses, the no treatment exposure time included both these patients, plus periods of non-treatment for patients who did receive antidepressant treatment during follow-up.

<sup>3</sup> Percentages are column percentages, within each characteristic

<sup>4</sup> Percentages are out of the number recorded

<sup>5</sup> Given percentage is for female patients only

**Table S4: 5-year hazard ratios for epilepsy/seizures by antidepressant class, dose and individual drug, with SSRIs, mid-dose SSRI and Citalopram as the reference categories respectively.**

|                                                             | No. of events <sup>1</sup> | Person years <sup>2</sup> | Unadjusted analyses |        |      |        | Adjusted <sup>3</sup> analyses |        |      |        |
|-------------------------------------------------------------|----------------------------|---------------------------|---------------------|--------|------|--------|--------------------------------|--------|------|--------|
|                                                             |                            |                           | HR                  | 95% CI |      | P      | HR                             | 95% CI |      | P      |
| <b>Antidepressant class</b>                                 |                            |                           |                     |        |      |        |                                |        |      |        |
| SSRIs                                                       | 309                        | 224,600                   | 1.00                |        |      |        | 1.00                           |        |      |        |
| TCAs                                                        | 82                         | 41,130                    | 1.44                | 1.12   | 1.83 | 0.004  | 1.21                           | 0.94   | 1.56 | 0.147  |
| Other antidepressants                                       | 58                         | 27,820                    | 1.58                | 1.21   | 2.06 | 0.001  | 1.22                           | 0.92   | 1.61 | 0.171  |
| Combined antidepressants                                    | 13                         | 4,220                     | 2.38                | 1.39   | 4.07 | 0.002  | 1.42                           | 0.79   | 2.57 | 0.239  |
| No current use                                              | 384                        | 566,890                   | 0.51                | 0.43   | 0.59 | <0.001 | 0.52                           | 0.44   | 0.61 | <0.001 |
| <b>Antidepressant class and dose categories<sup>4</sup></b> |                            |                           |                     |        |      |        |                                |        |      |        |
| SSRI: >0.5 DDD/≤ 1.0 DDD                                    | 213                        | 157,490                   | 1.00                |        |      |        | 1.00                           |        |      |        |
| No current use                                              | 384                        | 566,890                   | 0.52                | 0.43   | 0.63 | 0.000  | 0.53                           | 0.44   | 0.64 | <0.001 |
| TCA: ≤ 0.5 DDD                                              | 38                         | 23,520                    | 1.18                | 0.83   | 1.67 | 0.350  | 1.00                           | 0.70   | 1.44 | 0.981  |
| TCA: >0.5 DDD/≤ 1.0 DDD                                     | 28                         | 8,370                     | 2.53                | 1.71   | 3.76 | 0.000  | 1.92                           | 1.28   | 2.89 | 0.002  |
| TCA: > 1.0 DDD                                              | 14                         | 5,240                     | 1.93                | 1.13   | 3.29 | 0.016  | 1.55                           | 0.90   | 2.69 | 0.117  |
| SSRI: ≤ 0.5 DDD                                             | 19                         | 15,970                    | 0.87                | 0.55   | 1.39 | 0.557  | 0.95                           | 0.60   | 1.52 | 0.829  |
| SSRI: > 1.0 DDD                                             | 67                         | 42,410                    | 1.21                | 0.91   | 1.60 | 0.189  | 1.07                           | 0.80   | 1.42 | 0.647  |
| Other: ≤ 0.5 DDD                                            | 6                          | 4,000                     | 1.09                | 0.49   | 2.45 | 0.831  | 0.90                           | 0.40   | 2.04 | 0.806  |
| Other: >0.5 DDD/≤ 1.0 DDD                                   | 31                         | 13,090                    | 1.94                | 1.36   | 2.75 | 0.000  | 1.40                           | 0.97   | 2.03 | 0.075  |
| Other: > 1.0 DDD                                            | 19                         | 8,330                     | 1.68                | 1.04   | 2.70 | 0.034  | 1.34                           | 0.82   | 2.18 | 0.246  |
| Combined antidepressants                                    | 13                         | 4,220                     | 2.45                | 1.42   | 4.23 | 0.001  | 1.44                           | 0.79   | 2.61 | 0.235  |
| <b>Antidepressant drug</b>                                  |                            |                           |                     |        |      |        |                                |        |      |        |
| Citalopram (SSRI)                                           | 136                        | 93,940                    | 1.00                |        |      |        | 1.00                           |        |      |        |
| No current use                                              | 384                        | 566,890                   | 0.48                | 0.40   | 0.59 | <0.001 | 0.49                           | 0.40   | 0.60 | <0.001 |
| Fluoxetine (SSRI)                                           | 111                        | 81,780                    | 0.93                | 0.72   | 1.22 | 0.615  | 0.94                           | 0.72   | 1.23 | 0.666  |
| Amitriptyline (TCA)                                         | 34                         | 19,550                    | 1.19                | 0.82   | 1.72 | 0.369  | 0.95                           | 0.65   | 1.41 | 0.811  |

|                           |    |        |      |      |      |        |      |      |      |       |
|---------------------------|----|--------|------|------|------|--------|------|------|------|-------|
| Sertraline (SSRI)         | 22 | 18,790 | 0.82 | 0.53 | 1.27 | 0.381  | 0.77 | 0.49 | 1.20 | 0.251 |
| Venlafaxine (other)       | 36 | 15,500 | 1.74 | 1.22 | 2.49 | 0.002  | 1.40 | 0.95 | 2.05 | 0.091 |
| Paroxetine (SSRI)         | 26 | 16,500 | 1.13 | 0.72 | 1.79 | 0.596  | 1.00 | 0.61 | 1.62 | 0.984 |
| Mirtazapine (other)       | 17 | 10,070 | 1.13 | 0.69 | 1.86 | 0.617  | 0.85 | 0.51 | 1.40 | 0.521 |
| Escitalopram (SSRI)       | 14 | 13,310 | 0.71 | 0.40 | 1.25 | 0.234  | 0.73 | 0.41 | 1.30 | 0.287 |
| Dosulepin (TCA)           | 21 | 12,120 | 1.23 | 0.77 | 1.96 | 0.389  | 1.08 | 0.67 | 1.74 | 0.763 |
| Lofepamine (TCA)          | 12 | 4,750  | 1.68 | 0.93 | 3.03 | 0.086  | 1.52 | 0.83 | 2.77 | 0.175 |
| Trazodone (TCA)           | 12 | 2,320  | 3.47 | 1.96 | 6.16 | <0.001 | 2.66 | 1.49 | 4.76 | 0.001 |
| All other antidepressants | 8  | 4,910  | 1.11 | 0.55 | 2.25 | 0.778  | 0.82 | 0.40 | 1.69 | 0.596 |
| Combined antidepressants  | 13 | 4,220  | 2.27 | 1.32 | 3.88 | 0.003  | 1.33 | 0.73 | 2.41 | 0.345 |

<sup>1</sup> Based on numbers in adjusted analysis

<sup>2</sup> Person years of exposure, based on adjusted analyses

<sup>3</sup> Adjusted for age, sex, year of diagnosis of depression, severity of depression, deprivation, smoking status, alcohol intake, ethnic group (white/not recorded or non-white), coronary heart disease, diabetes, hypertension, cancer, hypothyroidism, osteoarthritis, asthma/chronic obstructive airways disease, stroke/TIA, rheumatoid arthritis, osteoporosis, liver disease, renal disease, obsessive-compulsive disorder, statins, NSAIDs, aspirin, antihypertensive drugs, anticonvulsants, hypnotics/anxiolytics, oral contraceptives, hormone replacement therapy, antipsychotics, bisphosphonates, anticoagulants

<sup>4</sup> Total numbers in the analysis of dosage are less due to missing data.

DDD = defined daily dose

**Table S5: 5-year hazard ratios for epilepsy/seizures by antidepressant class, dose and individual drug, with untreated patients excluded from the cohort.**

|                                                             | No. of events <sup>1</sup> | Person years <sup>2</sup> | Unadjusted analyses |        |       |        | Adjusted <sup>3</sup> analyses |        |      |        |
|-------------------------------------------------------------|----------------------------|---------------------------|---------------------|--------|-------|--------|--------------------------------|--------|------|--------|
|                                                             |                            |                           | HR                  | 95% CI |       | P      | HR                             | 95% CI |      | P      |
| <b>Antidepressant class</b>                                 |                            |                           |                     |        |       |        |                                |        |      |        |
| No current use                                              | 310                        | 471,190                   | 1.00                |        |       |        | 1.00                           |        |      |        |
| TCA                                                         | 82                         | 41,130                    | 2.92                | 2.28   | 3.74  | <0.001 | 2.43                           | 1.87   | 3.15 | <0.001 |
| SSRI                                                        | 309                        | 224,600                   | 2.04                | 1.72   | 2.40  | <0.001 | 2.00                           | 1.68   | 2.38 | <0.001 |
| Other antidepressants                                       | 58                         | 27,820                    | 3.20                | 2.44   | 4.19  | <0.001 | 2.44                           | 1.82   | 3.26 | <0.001 |
| Combined antidepressants                                    | 13                         | 4,220                     | 4.83                | 2.85   | 8.18  | <0.001 | 2.86                           | 1.59   | 5.14 | <0.001 |
| <b>Antidepressant class and dose categories<sup>4</sup></b> |                            |                           |                     |        |       |        |                                |        |      |        |
| No current use                                              | 310                        | 471,190                   | 1.00                |        |       |        | 1.00                           |        |      |        |
| TCA: ≤ 0.5 DDD                                              | 38                         | 23,520                    | 2.33                | 1.63   | 3.32  | <0.001 | 1.99                           | 1.38   | 2.89 | <0.001 |
| TCA: >0.5 DDD/≤ 1.0 DDD                                     | 28                         | 8,370                     | 5.00                | 3.41   | 7.32  | <0.001 | 3.82                           | 2.58   | 5.65 | <0.001 |
| TCA: > 1.0 DDD                                              | 14                         | 5,240                     | 3.80                | 2.24   | 6.46  | <0.001 | 3.08                           | 1.80   | 5.27 | <0.001 |
| SSRI: ≤ 0.5 DDD                                             | 19                         | 15,970                    | 1.71                | 1.09   | 2.68  | 0.020  | 1.88                           | 1.19   | 2.95 | 0.006  |
| SSRI: >0.5 DDD/≤ 1.0 DDD                                    | 213                        | 157,490                   | 1.98                | 1.62   | 2.40  | <0.001 | 1.98                           | 1.62   | 2.42 | <0.001 |
| SSRI: > 1.0 DDD                                             | 67                         | 42,410                    | 2.38                | 1.84   | 3.07  | <0.001 | 2.12                           | 1.62   | 2.77 | <0.001 |
| Other: ≤ 0.5 DDD                                            | 6                          | 4,000                     | 2.15                | 0.98   | 4.73  | 0.057  | 1.79                           | 0.81   | 3.98 | 0.150  |
| Other: >0.5 DDD/≤ 1.0 DDD                                   | 31                         | 13,090                    | 3.81                | 2.70   | 5.39  | <0.001 | 2.76                           | 1.90   | 4.01 | <0.001 |
| Other: > 1.0 DDD                                            | 19                         | 8,330                     | 3.29                | 2.05   | 5.29  | <0.001 | 2.65                           | 1.62   | 4.32 | <0.001 |
| Combined antidepressants                                    | 13                         | 4,220                     | 4.82                | 2.84   | 8.17  | <0.001 | 2.85                           | 1.59   | 5.14 | <0.001 |
| <b>Antidepressant drug</b>                                  |                            |                           |                     |        |       |        |                                |        |      |        |
| No current use                                              | 310                        | 471,190                   | 1.00                |        |       |        | 1.00                           |        |      |        |
| Amitriptyline (TCA)                                         | 34                         | 19,550                    | 2.53                | 1.80   | 3.57  | <0.001 | 2.03                           | 1.41   | 2.91 | <0.001 |
| Dosulepin (TCA)                                             | 21                         | 12,120                    | 2.63                | 1.68   | 4.10  | <0.001 | 2.29                           | 1.44   | 3.62 | <0.001 |
| Lofepamine (TCA)                                            | 12                         | 4,750                     | 3.59                | 2.03   | 6.36  | <0.001 | 3.24                           | 1.81   | 5.77 | <0.001 |
| Trazodone (TCA)                                             | 12                         | 2,320                     | 7.41                | 4.19   | 13.11 | <0.001 | 5.61                           | 3.15   | 9.98 | <0.001 |

|                           |     |        |      |      |      |        |      |      |      |        |
|---------------------------|-----|--------|------|------|------|--------|------|------|------|--------|
| Citalopram (SSRI)         | 136 | 93,940 | 2.14 | 1.75 | 2.61 | <0.001 | 2.12 | 1.72 | 2.62 | <0.001 |
| Escitalopram (SSRI)       | 14  | 13,310 | 1.51 | 0.85 | 2.67 | 0.156  | 1.55 | 0.87 | 2.76 | 0.133  |
| Fluoxetine (SSRI)         | 111 | 81,780 | 2.00 | 1.59 | 2.52 | <0.001 | 2.00 | 1.58 | 2.53 | <0.001 |
| Paroxetine (SSRI)         | 26  | 16,500 | 2.42 | 1.53 | 3.83 | <0.001 | 2.12 | 1.31 | 3.42 | 0.002  |
| Sertraline (SSRI)         | 22  | 18,790 | 1.76 | 1.15 | 2.70 | 0.010  | 1.63 | 1.05 | 2.54 | 0.030  |
| Mirtazapine (other)       | 17  | 10,070 | 2.42 | 1.50 | 3.90 | <0.001 | 1.78 | 1.09 | 2.91 | 0.021  |
| Venlafaxine (other)       | 36  | 15,500 | 3.70 | 2.64 | 5.19 | <0.001 | 2.97 | 2.06 | 4.29 | <0.001 |
| All other antidepressants | 8   | 4,910  | 2.36 | 1.19 | 4.70 | 0.014  | 1.77 | 0.88 | 3.54 | 0.108  |
| Combined antidepressants  | 13  | 4,220  | 4.83 | 2.85 | 8.18 | <0.001 | 2.83 | 1.57 | 5.09 | 0.001  |

<sup>1</sup> Based on numbers in adjusted analysis

<sup>2</sup> Person years of exposure, based on adjusted analyses

<sup>3</sup> Adjusted for age, sex, year of diagnosis of depression, severity of depression, deprivation, smoking status, alcohol intake, ethnic group (white/not recorded or non-white), coronary heart disease, diabetes, hypertension, cancer, hypothyroidism, osteoarthritis, asthma/chronic obstructive airways disease, stroke/TIA, rheumatoid arthritis, osteoporosis, liver disease, renal disease, obsessive-compulsive disorder, statins, NSAIDs, aspirin, antihypertensive drugs, anticonvulsants, hypnotics/anxiolytics, oral contraceptives, hormone replacement therapy, antipsychotics, bisphosphonates, anticoagulants

<sup>4</sup> Total numbers in the analysis of dosage are less due to missing data on dose.

DDD = defined daily dose

**Table S6: 5-year hazard ratios for epilepsy/seizures by antidepressant class, dose and individual drug, with patients on anticonvulsants at baseline excluded from the cohort.**

|                                                             | No. of events <sup>1</sup> | Person years <sup>2</sup> | Unadjusted analyses |        |      |        | Adjusted <sup>3</sup> analyses |        |      |        |
|-------------------------------------------------------------|----------------------------|---------------------------|---------------------|--------|------|--------|--------------------------------|--------|------|--------|
|                                                             |                            |                           | HR                  | 95% CI |      | P      | HR                             | 95% CI |      | P      |
| <b>Antidepressant class</b>                                 |                            |                           |                     |        |      |        |                                |        |      |        |
| No current use                                              | 351                        | 565,170                   | 1.00                |        |      |        | 1.00                           |        |      |        |
| TCAs                                                        | 75                         | 40,630                    | 2.93                | 2.28   | 3.76 | <0.001 | 2.70                           | 2.08   | 3.50 | <0.001 |
| SSRIs                                                       | 275                        | 223,480                   | 1.97                | 1.67   | 2.32 | <0.001 | 1.96                           | 1.65   | 2.32 | <0.001 |
| Other antidepressants                                       | 51                         | 27,550                    | 3.01                | 2.26   | 4.01 | <0.001 | 2.52                           | 1.86   | 3.41 | <0.001 |
| Combined antidepressants                                    | 12                         | 4,120                     | 4.88                | 2.82   | 8.46 | <0.001 | 3.91                           | 2.19   | 6.97 | <0.001 |
| <b>Antidepressant class and dose categories<sup>4</sup></b> |                            |                           |                     |        |      |        |                                |        |      |        |
| No current use                                              | 351                        | 565,170                   | 1.00                |        |      |        | 1.00                           |        |      |        |
| TCA: ≤ 0.5 DDD                                              | 36                         | 23,230                    | 2.43                | 1.70   | 3.46 | <0.001 | 2.35                           | 1.63   | 3.38 | <0.001 |
| TCA: >0.5 DDD/≤ 1.0 DDD                                     | 23                         | 8,270                     | 4.52                | 2.94   | 6.95 | <0.001 | 3.80                           | 2.44   | 5.90 | <0.001 |
| TCA: > 1.0 DDD                                              | 14                         | 5,180                     | 4.15                | 2.45   | 7.03 | <0.001 | 3.58                           | 2.10   | 6.12 | <0.001 |
| SSRI: ≤ 0.5 DDD                                             | 16                         | 15,900                    | 1.57                | 0.96   | 2.58 | 0.074  | 1.74                           | 1.06   | 2.87 | 0.029  |
| SSRI: >0.5 DDD/≤ 1.0 DDD                                    | 192                        | 156,780                   | 1.94                | 1.61   | 2.35 | <0.001 | 1.98                           | 1.63   | 2.40 | <0.001 |
| SSRI: > 1.0 DDD                                             | 58                         | 42,130                    | 2.23                | 1.73   | 2.89 | <0.001 | 2.02                           | 1.54   | 2.63 | <0.001 |
| Other: ≤ 0.5 DDD                                            | 6                          | 3,960                     | 2.34                | 1.06   | 5.18 | 0.036  | 2.15                           | 0.97   | 4.78 | 0.060  |
| Other: >0.5 DDD/≤ 1.0 DDD                                   | 25                         | 12,970                    | 3.31                | 2.26   | 4.86 | <0.001 | 2.63                           | 1.75   | 3.96 | <0.001 |
| Other: > 1.0 DDD                                            | 19                         | 8,250                     | 3.53                | 2.21   | 5.65 | <0.001 | 3.03                           | 1.87   | 4.90 | <0.001 |
| Combined antidepressants                                    | 12                         | 4,120                     | 4.88                | 2.82   | 8.46 | <0.001 | 3.92                           | 2.20   | 6.99 | <0.001 |
| <b>Antidepressant drug</b>                                  |                            |                           |                     |        |      |        |                                |        |      |        |
| No current use                                              | 351                        | 565,170                   | 1.00                |        |      |        | 1.00                           |        |      |        |
| Amitriptyline (TCA)                                         | 30                         | 19,220                    | 2.45                | 1.70   | 3.52 | <0.001 | 2.31                           | 1.59   | 3.34 | <0.001 |
| Dosulepin (TCA)                                             | 20                         | 12,050                    | 2.74                | 1.76   | 4.26 | <0.001 | 2.48                           | 1.57   | 3.90 | <0.001 |
| Lofepamine (TCA)                                            | 11                         | 4,720                     | 3.61                | 1.99   | 6.56 | <0.001 | 3.26                           | 1.78   | 5.98 | <0.001 |

|                           |     |        |      |      |       |        |      |      |       |        |
|---------------------------|-----|--------|------|------|-------|--------|------|------|-------|--------|
| Trazodone (TCA)           | 11  | 2,300  | 7.40 | 4.05 | 13.51 | <0.001 | 5.95 | 3.26 | 10.85 | <0.001 |
| Citalopram (SSRI)         | 120 | 93,440 | 2.04 | 1.66 | 2.51  | <0.001 | 2.05 | 1.65 | 2.54  | <0.001 |
| Escitalopram (SSRI)       | 11  | 13,240 | 1.29 | 0.68 | 2.46  | 0.439  | 1.33 | 0.69 | 2.54  | 0.391  |
| Fluoxetine (SSRI)         | 100 | 81,410 | 1.96 | 1.55 | 2.46  | <0.001 | 1.99 | 1.57 | 2.52  | <0.001 |
| Paroxetine (SSRI)         | 23  | 16,450 | 2.36 | 1.52 | 3.66  | <0.001 | 2.08 | 1.31 | 3.31  | 0.002  |
| Sertraline (SSRI)         | 21  | 18,670 | 1.83 | 1.20 | 2.79  | 0.005  | 1.74 | 1.13 | 2.69  | 0.012  |
| Mirtazapine (other)       | 16  | 9,970  | 2.47 | 1.51 | 4.03  | <0.001 | 1.95 | 1.18 | 3.21  | 0.009  |
| Venlafaxine (other)       | 31  | 15,370 | 3.40 | 2.37 | 4.87  | <0.001 | 2.96 | 2.02 | 4.35  | <0.001 |
| All other antidepressants | 7   | 4,820  | 2.26 | 1.09 | 4.69  | 0.028  | 2.17 | 1.05 | 4.47  | 0.036  |
| Combined antidepressants  | 12  | 4,120  | 4.88 | 2.82 | 8.46  | <0.001 | 3.90 | 2.18 | 6.95  | <0.001 |

<sup>1</sup> Based on numbers in adjusted analysis

<sup>2</sup> Person years of exposure, based on adjusted analyses

<sup>3</sup> Adjusted for age, sex, year of diagnosis of depression, severity of depression, deprivation, smoking status, alcohol intake, ethnic group (white/not recorded or non-white), coronary heart disease, diabetes, hypertension, cancer, hypothyroidism, osteoarthritis, asthma/chronic obstructive airways disease, stroke/TIA, rheumatoid arthritis, osteoporosis, liver disease, renal disease, obsessive-compulsive disorder, statins, NSAIDs, aspirin, antihypertensive drugs, anticonvulsants, hypnotics/anxiolytics, oral contraceptives, hormone replacement therapy, antipsychotics, bisphosphonates, anticoagulants

<sup>4</sup> Total numbers in the analysis of dosage are less due to missing data on dose.

DDD = defined daily dose

**Table S7: 1-year hazard ratios for epilepsy/seizures by antidepressant class, dose and individual drug.**

|                                                             | No. of events <sup>1</sup> | Person years <sup>2</sup> | Unadjusted analyses |        |       |        | Adjusted <sup>3</sup> analyses |        |       |        |
|-------------------------------------------------------------|----------------------------|---------------------------|---------------------|--------|-------|--------|--------------------------------|--------|-------|--------|
|                                                             |                            |                           | HR                  | 95% CI |       | P      | HR                             | 95% CI |       | P      |
| <b>Antidepressant class</b>                                 |                            |                           |                     |        |       |        |                                |        |       |        |
| No current use                                              | 80                         | 94,330                    | 1.00                |        |       |        | 1.00                           |        |       |        |
| TCA's                                                       | 30                         | 16,340                    | 2.11                | 1.35   | 3.30  | 0.001  | 1.77                           | 1.11   | 2.83  | 0.016  |
| SSRIs                                                       | 129                        | 99,590                    | 1.54                | 1.14   | 2.06  | 0.004  | 1.55                           | 1.15   | 2.10  | 0.004  |
| Other antidepressants                                       | 18                         | 8,190                     | 2.79                | 1.72   | 4.52  | <0.001 | 1.99                           | 1.18   | 3.36  | 0.010  |
| Combined antidepressants                                    | 7                          | 860                       | 10.73               | 5.09   | 22.62 | <0.001 | 6.13                           | 2.58   | 14.58 | <0.001 |
| <b>Antidepressant class and dose categories<sup>4</sup></b> |                            |                           |                     |        |       |        |                                |        |       |        |
| No current use                                              | 80                         | 94,330                    | 1.00                |        |       |        | 1.00                           |        |       |        |
| TCA: ≤ 0.5 DDD                                              | 12                         | 9,520                     | 1.43                | 0.75   | 2.70  | 0.277  | 1.21                           | 0.62   | 2.33  | 0.580  |
| TCA: >0.5 DDD/≤ 1.0 DDD                                     | 14                         | 3,030                     | 5.22                | 2.91   | 9.37  | <0.001 | 4.19                           | 2.31   | 7.61  | <0.001 |
| TCA: > 1.0 DDD                                              | 3                          | 1,990                     | 1.68                | 0.54   | 5.24  | 0.368  | 1.47                           | 0.47   | 4.58  | 0.511  |
| SSRI: ≤ 0.5 DDD                                             | 9                          | 6,090                     | 1.68                | 0.84   | 3.36  | 0.143  | 1.76                           | 0.87   | 3.56  | 0.117  |
| SSRI: >0.5 DDD/≤ 1.0 DDD                                    | 94                         | 77,030                    | 1.42                | 1.03   | 1.97  | 0.032  | 1.46                           | 1.05   | 2.02  | 0.023  |
| SSRI: > 1.0 DDD                                             | 21                         | 12,950                    | 1.86                | 1.14   | 3.02  | 0.013  | 1.81                           | 1.10   | 2.97  | 0.020  |
| Other: ≤ 0.5 DDD                                            | 2                          | 1,260                     | 1.79                | 0.45   | 7.20  | 0.411  | 1.59                           | 0.39   | 6.42  | 0.518  |
| Other: >0.5 DDD/≤ 1.0 DDD                                   | 12                         | 4,350                     | 3.63                | 2.07   | 6.36  | <0.001 | 2.57                           | 1.40   | 4.74  | 0.002  |
| Other: > 1.0 DDD                                            | 3                          | 1,640                     | 2.10                | 0.67   | 6.65  | 0.205  | 1.53                           | 0.46   | 5.09  | 0.486  |
| Combined antidepressants                                    | 7                          | 860                       | 10.68               | 5.06   | 22.54 | <0.001 | 6.05                           | 2.53   | 14.46 | <0.001 |
| <b>Antidepressant drug</b>                                  |                            |                           |                     |        |       |        |                                |        |       |        |
| No current use                                              | 80                         | 94,330                    | 1.00                |        |       |        | 1.00                           |        |       |        |
| Citalopram (SSRI)                                           | 66                         | 40,630                    | 1.90                | 1.35   | 2.66  | <0.001 | 1.99                           | 1.40   | 2.81  | <0.001 |
| Fluoxetine (SSRI)                                           | 44                         | 38,180                    | 1.36                | 0.94   | 1.98  | 0.106  | 1.41                           | 0.96   | 2.07  | 0.078  |
| Amitriptyline (TCA)                                         | 14                         | 6,920                     | 2.33                | 1.30   | 4.18  | 0.005  | 1.84                           | 1.00   | 3.36  | 0.049  |
| Sertraline (SSRI)                                           | 5                          | 7,550                     | 0.91                | 0.39   | 2.09  | 0.820  | 0.76                           | 0.31   | 1.88  | 0.557  |

|                           |    |       |       |      |       |        |      |      |       |        |
|---------------------------|----|-------|-------|------|-------|--------|------|------|-------|--------|
| Venlafaxine (other)       | 11 | 4,260 | 3.49  | 1.96 | 6.21  | <0.001 | 2.49 | 1.30 | 4.76  | 0.006  |
| Paroxetine (SSRI)         | 8  | 7,850 | 1.31  | 0.65 | 2.63  | 0.446  | 1.06 | 0.50 | 2.24  | 0.877  |
| Mirtazapine (other)       | 5  | 3,210 | 1.77  | 0.73 | 4.30  | 0.209  | 1.38 | 0.55 | 3.42  | 0.493  |
| Escitalopram (SSRI)       | 6  | 5,300 | 1.29  | 0.56 | 3.01  | 0.549  | 1.37 | 0.59 | 3.21  | 0.468  |
| Dosulepin (TCA)           | 9  | 5,510 | 1.88  | 0.93 | 3.81  | 0.080  | 1.71 | 0.83 | 3.50  | 0.144  |
| Lofepamine (TCA)          | 3  | 2,280 | 1.48  | 0.47 | 4.63  | 0.498  | 1.43 | 0.46 | 4.51  | 0.538  |
| Trazodone (TCA)           | 3  | 820   | 4.16  | 1.30 | 13.34 | 0.016  | 2.85 | 0.79 | 10.21 | 0.108  |
| All other antidepressants | 3  | 1,620 | 2.12  | 0.65 | 6.99  | 0.215  | 1.47 | 0.44 | 4.85  | 0.530  |
| Combined antidepressants  | 7  | 860   | 10.73 | 5.09 | 22.61 | <0.001 | 6.16 | 2.59 | 14.64 | <0.001 |

<sup>1</sup> Based on numbers in adjusted analysis

<sup>2</sup> Person years of exposure, based on adjusted analyses

<sup>3</sup> Adjusted for age, sex, year of diagnosis of depression, severity of depression, deprivation, smoking status, alcohol intake, ethnic group (white/not recorded or non-white), coronary heart disease, diabetes, hypertension, cancer, hypothyroidism, osteoarthritis, asthma/chronic obstructive airways disease, stroke/TIA, rheumatoid arthritis, osteoporosis, liver disease, renal disease, obsessive-compulsive disorder, statins, NSAIDs, aspirin, antihypertensive drugs, anticonvulsants, hypnotics/anxiolytics, oral contraceptives, hormone replacement therapy, antipsychotics, bisphosphonates, anticoagulants

<sup>4</sup> Total numbers in the analysis of dosage are less due to missing data.

DDD = defined daily dose

**Table S8: 1-year hazard ratios for epilepsy/seizures by antidepressant class, dose and individual drug, with SSRIs, mid-dose SSRI and Citalopram as the reference categories respectively.**

|                                                             | No. of events <sup>1</sup> | Person years <sup>2</sup> | Unadjusted analyses |        |       |        | Adjusted <sup>3</sup> analyses |        |      |        |
|-------------------------------------------------------------|----------------------------|---------------------------|---------------------|--------|-------|--------|--------------------------------|--------|------|--------|
|                                                             |                            |                           | HR                  | 95% CI |       | P      | HR                             | 95% CI |      | P      |
| <b>Antidepressant class</b>                                 |                            |                           |                     |        |       |        |                                |        |      |        |
| SSRIs                                                       | 129                        | 99,950                    | 1.00                |        |       |        | 1.00                           |        |      |        |
| TCAs                                                        | 30                         | 16,340                    | 1.37                | 0.93   | 2.03  | 0.114  | 1.14                           | 0.76   | 1.72 | 0.523  |
| Other antidepressants                                       | 18                         | 8,190                     | 1.81                | 1.14   | 2.90  | 0.013  | 1.28                           | 0.78   | 2.12 | 0.333  |
| Combined antidepressants                                    | 7                          | 860                       | 6.99                | 3.37   | 14.48 | <0.001 | 3.95                           | 1.70   | 9.17 | 0.001  |
| No current use                                              | 80                         | 94,330                    | 0.65                | 0.48   | 0.87  | 0.004  | 0.64                           | 0.48   | 0.87 | 0.004  |
| <b>Antidepressant class and dose categories<sup>4</sup></b> |                            |                           |                     |        |       |        |                                |        |      |        |
| SSRI: >0.5 DDD/≤ 1.0 DDD                                    | 94                         | 77,030                    | 1.00                |        |       |        | 1.00                           |        |      |        |
| No current use                                              | 80                         | 94,330                    | 0.70                | 0.51   | 0.97  | 0.032  | 0.69                           | 0.49   | 0.95 | 0.023  |
| TCA: ≤ 0.5 DDD                                              | 12                         | 9,520                     | 1.00                | 0.56   | 1.78  | 0.999  | 0.83                           | 0.45   | 1.51 | 0.533  |
| TCA: >0.5 DDD/≤ 1.0 DDD                                     | 14                         | 3,030                     | 3.67                | 2.07   | 6.50  | <0.001 | 2.87                           | 1.60   | 5.16 | <0.001 |
| TCA: > 1.0 DDD                                              | 3                          | 1,990                     | 1.18                | 0.38   | 3.71  | 0.775  | 1.00                           | 0.32   | 3.17 | 0.994  |
| SSRI: ≤ 0.5 DDD                                             | 9                          | 6,090                     | 1.18                | 0.59   | 2.36  | 0.641  | 1.21                           | 0.60   | 2.43 | 0.601  |
| SSRI: > 1.0 DDD                                             | 21                         | 12,950                    | 1.30                | 0.80   | 2.13  | 0.289  | 1.24                           | 0.75   | 2.03 | 0.401  |
| Other: ≤ 0.5 DDD                                            | 2                          | 1,260                     | 1.26                | 0.31   | 5.09  | 0.748  | 1.09                           | 0.27   | 4.41 | 0.907  |
| Other: >0.5 DDD/≤ 1.0 DDD                                   | 12                         | 4,350                     | 2.55                | 1.45   | 4.48  | 0.001  | 1.76                           | 0.95   | 3.26 | 0.070  |
| Other: > 1.0 DDD                                            | 3                          | 1,640                     | 1.48                | 0.47   | 4.69  | 0.508  | 1.05                           | 0.32   | 3.48 | 0.937  |
| Combined antidepressants                                    | 7                          | 860                       | 7.50                | 3.59   | 15.64 | <0.001 | 4.14                           | 1.76   | 9.76 | 0.001  |
| <b>Antidepressant drug</b>                                  |                            |                           |                     |        |       |        |                                |        |      |        |
| Citalopram (SSRI)                                           | 66                         | 40,630                    | 1.00                |        |       |        | 1.00                           |        |      |        |
| No current use                                              | 80                         | 94,330                    | 0.53                | 0.38   | 0.74  | <0.001 | 0.50                           | 0.36   | 0.71 | <0.001 |
| Fluoxetine (SSRI)                                           | 44                         | 38,180                    | 0.72                | 0.49   | 1.05  | 0.084  | 0.71                           | 0.49   | 1.04 | 0.079  |
| Amitriptyline (TCA)                                         | 14                         | 6,920                     | 1.23                | 0.69   | 2.19  | 0.482  | 0.92                           | 0.51   | 1.68 | 0.795  |

|                           |    |       |      |      |       |        |      |      |      |       |
|---------------------------|----|-------|------|------|-------|--------|------|------|------|-------|
| Sertraline (SSRI)         | 5  | 7,550 | 0.48 | 0.21 | 1.10  | 0.084  | 0.38 | 0.15 | 0.95 | 0.039 |
| Venlafaxine (other)       | 11 | 4,260 | 1.84 | 1.02 | 3.34  | 0.044  | 1.25 | 0.64 | 2.43 | 0.509 |
| Paroxetine (SSRI)         | 8  | 7,850 | 0.69 | 0.34 | 1.39  | 0.299  | 0.53 | 0.25 | 1.14 | 0.105 |
| Mirtazapine (other)       | 5  | 3,210 | 0.93 | 0.38 | 2.31  | 0.881  | 0.69 | 0.27 | 1.75 | 0.435 |
| Escitalopram (SSRI)       | 6  | 5,300 | 0.68 | 0.30 | 1.58  | 0.373  | 0.69 | 0.30 | 1.59 | 0.385 |
| Dosulepin (TCA)           | 9  | 5,510 | 0.99 | 0.50 | 1.95  | 0.982  | 0.86 | 0.43 | 1.71 | 0.664 |
| Lofepamine (TCA)          | 3  | 2,280 | 0.78 | 0.24 | 2.51  | 0.680  | 0.72 | 0.22 | 2.33 | 0.585 |
| Trazodone (TCA)           | 3  | 820   | 2.20 | 0.70 | 6.91  | 0.178  | 1.43 | 0.40 | 5.13 | 0.580 |
| All other antidepressants | 3  | 1,620 | 1.12 | 0.35 | 3.63  | 0.849  | 0.74 | 0.22 | 2.42 | 0.616 |
| Combined antidepressants  | 7  | 860   | 5.66 | 2.69 | 11.91 | <0.001 | 3.10 | 1.31 | 7.32 | 0.010 |

<sup>1</sup> Based on numbers in adjusted analysis

<sup>2</sup> Person years of exposure, based on adjusted analyses

<sup>3</sup> Adjusted for age, sex, year of diagnosis of depression, severity of depression, deprivation, smoking status, alcohol intake, ethnic group (white/not recorded or non-white), coronary heart disease, diabetes, hypertension, cancer, hypothyroidism, osteoarthritis, asthma/chronic obstructive airways disease, stroke/TIA, rheumatoid arthritis, osteoporosis, liver disease, renal disease, obsessive-compulsive disorder, statins, NSAIDs, aspirin, antihypertensive drugs, anticonvulsants, hypnotics/anxiolytics, oral contraceptives, hormone replacement therapy, antipsychotics, bisphosphonates, anticoagulants

<sup>4</sup> Total numbers in the analysis of dosage are less due to missing data.

DDD = defined daily dose
